# Supplementary material for: Semi-supervised associative classification using ant colony optimization algorithm
Source: PeerJ journal article supplement (doi:10.7717/peerj-cs.676), 2021-09-10
Supplement: SSAC.zip [file SSAC.zip]

## Sheet: Data
Attrib_0	Attrib_1	Attrib_2	Attrib_3	Attrib_4	Attrib_5	Attrib_6	Attrib_7	Attrib_8	Attrib_9	class
o	o	b	b	o	x	x	o	x	b	negative
o	o	o	o	b	x	b	x	x	b	negative
o	o	x	b	o	x	x	o	b	b	negative
b	b	o	b	x	o	x	b	o	x	negative
x	x	b	o	x	o	x	o	x	o	negative
o	o	x	x	o	o	o	x	x	b	negative
o	o	x	x	o	b	o	o	x	x	negative
b	b	x	o	x	o	x	o	o	x	negative
x	x	x	o	x	x	b	o	o	o	negative
o	o	o	o	x	b	b	x	x	b	negative
b	b	x	o	x	o	b	o	b	x	negative
o	o	x	x	x	b	x	o	o	o	negative
o	o	x	x	o	b	b	o	b	x	negative
x	x	x	o	x	b	x	o	o	o	negative
x	x	x	o	b	o	b	o	x	b	negative
x	x	x	o	x	x	o	o	b	o	negative
x	x	o	x	o	o	x	x	x	o	negative
x	x	x	b	x	o	x	o	o	o	negative
o	o	x	b	o	x	b	o	b	x	negative
x	x	x	o	b	o	o	o	x	x	negative
o	o	x	x	o	o	x	o	x	b	negative
o	o	x	x	o	o	b	x	x	o	negative
x	x	x	b	o	o	o	x	o	x	negative
o	o	x	b	o	o	x	x	x	o	negative
o	o	x	x	x	x	o	o	o	x	negative
x	x	o	x	x	o	x	o	o	b	negative
x	x	x	o	b	o	x	o	b	b	negative
o	o	x	b	o	x	x	o	o	x	negative
b	b	x	o	x	b	o	b	x	o	negative
o	o	x	o	o	x	x	x	o	x	negative
b	b	x	b	x	b	x	o	o	o	negative
b	b	o	x	x	o	o	x	o	x	negative
b	b	x	o	x	o	o	x	x	o	negative
o	o	x	x	o	b	x	o	b	b	negative
o	o	b	x	x	o	x	x	o	o	negative
b	b	b	o	x	b	o	x	x	o	negative
b	b	x	x	o	x	x	o	o	o	negative
x	x	b	o	x	o	b	o	b	x	negative
x	x	o	x	o	o	b	x	o	x	negative
o	o	b	x	x	o	o	x	x	o	negative
b	b	x	b	x	x	b	o	o	o	negative
x	x	o	x	b	o	b	b	o	x	negative
o	o	x	o	x	x	o	x	o	x	negative
x	x	b	x	o	x	x	o	o	o	negative
b	b	o	b	x	o	x	x	o	b	negative
x	x	x	b	b	b	x	o	o	o	negative
o	o	o	x	x	o	b	x	x	o	negative
x	x	b	b	o	o	o	x	x	b	negative
x	x	o	x	x	b	x	o	o	o	negative
o	o	x	x	x	o	o	x	b	o	negative
b	b	x	b	o	o	o	b	x	x	negative
b	b	o	x	x	o	b	b	o	x	negative
x	x	b	x	x	b	b	o	o	o	negative
o	o	x	x	x	o	b	x	o	o	negative
x	x	o	x	x	o	o	o	x	x	negative
o	o	x	x	x	x	b	o	o	o	negative
o	o	o	x	o	x	x	o	x	b	negative
x	x	x	o	x	o	x	o	b	o	negative
b	b	b	x	x	b	x	o	o	o	negative
x	x	o	x	o	o	x	x	o	b	negative
x	x	b	o	b	o	x	o	b	x	negative
b	b	b	x	o	o	o	x	x	b	negative
x	x	o	x	o	x	x	o	x	o	negative
x	x	x	o	x	o	o	o	x	b	negative
o	o	b	o	o	x	x	o	x	x	negative
b	b	b	o	x	x	o	b	x	o	negative
o	o	o	x	b	o	x	x	x	o	negative
x	x	x	o	x	o	o	b	x	o	negative
o	o	x	x	x	o	o	b	x	o	negative
x	x	o	x	x	o	o	b	o	x	negative
x	x	o	b	x	o	b	b	o	x	negative
o	o	o	b	x	o	x	x	x	o	negative
b	b	b	x	o	o	o	b	x	x	negative
b	b	x	x	o	o	o	o	x	x	negative
x	x	o	b	b	o	x	b	o	x	negative
x	x	o	o	b	o	x	x	o	x	negative
o	o	x	x	b	x	x	o	o	o	negative
b	b	x	o	b	x	o	x	b	o	negative
o	o	o	o	x	o	x	x	b	x	negative
b	b	x	o	x	o	b	o	x	b	negative
o	o	o	o	x	o	x	x	x	b	negative
o	o	b	x	b	o	x	b	x	o	negative
x	x	b	b	o	o	o	b	x	x	negative
o	o	x	o	o	x	x	o	b	x	negative
x	x	x	b	o	o	o	b	x	b	negative
x	x	x	o	o	o	x	x	x	o	negative
o	o	o	o	o	x	x	x	b	x	negative
o	o	x	o	x	o	b	x	x	o	negative
o	o	x	x	b	o	b	x	b	o	negative
x	x	b	o	b	o	b	o	x	x	negative
o	o	x	x	o	b	x	o	x	o	negative
o	o	b	b	o	x	b	o	x	x	negative
o	o	x	x	o	x	o	o	b	x	negative
x	x	x	o	x	o	o	o	b	x	negative
o	o	x	x	o	x	x	o	o	b	negative
b	b	b	x	o	o	o	x	b	x	negative
x	x	o	o	x	o	x	b	o	x	negative
x	x	o	o	o	x	x	x	x	o	negative
o	o	x	b	x	o	o	x	x	o	negative
b	b	b	o	b	x	o	x	x	o	negative
o	o	o	o	x	x	b	o	x	x	negative
o	o	o	x	x	o	x	x	o	b	negative
x	x	o	x	x	x	o	o	x	o	negative
x	x	x	o	x	o	b	o	x	o	negative
x	x	o	x	x	x	b	o	o	o	negative
x	x	o	o	x	o	x	o	x	b	negative
b	b	b	o	x	x	o	x	b	o	negative
o	o	x	o	x	x	o	x	b	o	negative
x	x	x	b	b	x	b	o	o	o	negative
o	o	b	b	x	o	b	x	x	o	negative
b	b	b	x	x	x	b	o	o	o	negative
o	o	o	o	b	b	x	b	x	x	negative
o	o	x	x	b	o	x	o	x	o	negative
x	x	x	o	b	x	o	x	o	o	negative
o	o	o	o	x	x	b	x	x	o	negative
o	o	o	o	x	x	b	b	x	b	negative
o	o	o	o	x	o	x	b	x	x	negative
o	o	x	b	o	b	x	o	x	b	negative
b	b	x	o	b	b	o	x	x	o	negative
o	o	b	b	b	o	x	x	x	o	negative
x	x	b	o	x	o	b	o	x	b	negative
x	x	x	o	b	o	o	x	x	o	negative
o	o	o	o	x	x	b	x	b	b	negative
x	x	x	o	x	b	o	b	b	o	negative
o	o	b	x	o	o	x	x	x	o	negative
o	o	x	x	b	o	b	b	x	o	negative
x	x	b	o	x	o	x	o	b	b	negative
b	b	o	o	x	x	o	x	x	o	negative
o	o	x	o	x	o	x	o	x	b	negative
x	x	b	o	x	x	o	b	b	o	negative
x	x	x	o	x	x	o	b	o	o	negative
o	o	x	x	o	b	b	o	x	b	negative
o	o	x	x	x	o	b	b	b	o	negative
o	o	o	o	b	x	x	x	x	o	negative
x	x	b	x	o	o	o	b	x	b	negative
x	x	x	o	o	b	o	x	x	o	negative
o	o	b	b	x	o	x	b	x	o	negative
x	x	b	o	b	b	o	x	x	o	negative
x	x	b	o	b	o	x	o	x	b	negative
b	b	o	b	x	o	b	x	o	x	negative
x	x	x	o	x	b	o	o	x	o	negative
x	x	o	o	x	o	b	o	x	x	negative
x	x	b	b	x	x	b	o	o	o	negative
o	o	o	o	b	b	x	x	x	b	negative
o	o	x	x	o	o	x	b	x	o	negative
o	o	b	x	o	b	x	o	x	b	negative
o	o	x	x	x	o	x	b	o	o	negative
x	x	b	o	x	b	o	b	x	o	negative
o	o	x	o	b	o	x	x	x	o	negative
b	b	x	x	o	o	o	x	o	x	negative
o	o	x	x	x	o	x	o	b	o	negative
o	o	b	x	x	o	b	b	x	o	negative
x	x	x	b	x	b	b	o	o	o	negative
o	o	b	x	o	x	x	o	x	o	negative
o	o	o	o	b	x	b	x	b	x	negative
o	o	x	b	o	b	x	o	b	x	negative
b	b	b	o	x	o	x	o	b	x	negative
b	b	b	o	x	o	x	o	x	b	negative
x	x	b	x	o	o	o	o	x	x	negative
o	o	b	x	o	x	x	o	b	b	negative
b	b	x	b	o	o	o	x	b	x	negative
x	x	x	o	o	o	x	o	x	b	negative
o	o	x	x	x	o	o	o	x	x	negative
b	b	x	o	x	x	o	b	b	o	negative
o	o	b	b	o	x	x	o	b	x	negative
o	o	x	b	b	o	b	x	x	o	negative
x	x	b	o	x	o	x	o	o	x	negative
b	b	x	x	x	b	b	o	o	o	negative
b	b	x	x	o	o	o	x	x	o	negative
o	o	x	b	x	o	b	b	x	o	negative
b	b	x	x	o	o	o	b	x	b	negative
x	x	o	b	b	o	x	x	o	b	negative
x	x	o	x	b	o	x	x	o	o	negative
b	b	o	b	b	o	x	x	o	x	negative
o	o	b	o	x	o	x	x	x	o	negative
x	x	x	b	o	x	x	o	o	o	negative
o	o	b	x	b	o	x	x	b	o	negative
b	b	o	x	x	o	b	x	o	b	negative
o	o	o	o	x	b	b	b	x	x	negative
x	x	x	o	x	o	x	o	o	b	negative
x	x	x	o	b	o	b	o	b	x	negative
o	o	x	o	x	o	x	x	o	x	negative
o	o	x	o	b	o	x	o	x	x	negative
o	o	o	o	o	x	x	b	x	x	negative
b	b	o	o	x	o	x	x	o	x	negative
x	x	b	o	x	x	o	o	x	o	negative
x	x	b	o	x	o	o	o	x	x	negative
o	o	o	o	b	x	x	b	x	b	negative
b	b	b	o	b	o	x	o	x	x	negative
o	o	b	o	x	x	o	x	x	o	negative
x	x	x	b	o	o	o	x	x	o	negative
b	b	x	x	x	o	x	o	o	o	negative
x	x	x	o	o	o	o	b	x	x	negative
o	o	o	o	x	b	x	x	b	b	negative
x	x	x	o	o	o	o	x	b	x	negative
x	x	o	x	x	o	x	o	x	o	negative
x	x	o	o	b	x	o	x	x	o	negative
o	o	x	b	x	o	x	x	o	o	negative
b	b	x	o	o	o	x	o	x	x	negative
o	o	o	x	o	x	x	b	b	x	positive
x	x	b	x	o	x	b	o	o	x	positive
x	x	o	o	x	x	o	x	o	x	positive
o	o	x	x	o	o	x	b	b	x	positive
x	x	o	b	o	x	o	b	x	x	positive
o	o	o	x	x	b	x	b	o	x	positive
x	x	x	x	x	b	o	o	b	o	positive
b	b	o	o	x	x	x	b	x	o	positive
b	b	x	b	o	x	b	o	x	b	positive
x	x	x	o	b	x	o	b	o	x	positive
b	b	o	x	x	o	x	o	b	x	positive
o	o	x	b	x	x	o	o	x	b	positive
b	b	o	o	x	x	x	o	x	b	positive
x	x	b	b	x	b	o	x	b	o	positive
o	o	x	x	o	x	b	x	o	b	positive
o	o	b	b	o	x	o	x	x	x	positive
x	x	o	x	x	x	o	x	o	o	positive
x	x	b	b	b	x	o	b	o	x	positive
x	x	b	o	b	o	o	x	x	x	positive
x	x	b	o	o	x	o	b	x	x	positive
b	b	x	o	b	x	o	b	x	b	positive
x	x	x	b	o	x	o	o	x	b	positive
b	b	x	b	o	x	x	o	x	o	positive
o	o	b	x	o	o	x	x	b	x	positive
o	o	o	x	b	x	b	x	x	o	positive
x	x	o	x	o	b	x	b	o	x	positive
o	o	o	x	b	x	o	x	b	x	positive
x	x	o	b	o	x	b	x	o	x	positive
x	x	b	o	x	b	b	x	o	b	positive
x	x	o	x	o	x	o	o	x	x	positive
x	x	b	o	o	x	x	o	b	x	positive
b	b	b	x	b	o	x	o	b	x	positive
x	x	b	b	x	b	b	x	o	o	positive
o	o	o	b	x	x	x	x	b	o	positive
o	o	b	x	b	o	x	x	o	x	positive
x	x	x	o	o	x	o	x	o	x	positive
b	b	b	o	x	o	o	x	x	x	positive
x	x	x	x	x	o	o	b	b	o	positive
x	x	x	o	x	o	b	x	o	b	positive
b	b	x	o	o	x	o	b	x	x	positive
o	o	x	x	o	x	x	x	o	o	positive
b	b	o	x	b	o	o	x	x	x	positive
b	b	x	x	o	x	o	b	x	o	positive
o	o	o	x	x	b	x	o	b	x	positive
o	o	x	o	o	x	x	x	x	o	positive
b	b	x	o	o	x	x	o	x	b	positive
b	b	b	x	b	o	x	b	o	x	positive
b	b	x	b	b	x	o	b	x	o	positive
b	b	o	o	b	x	o	x	x	x	positive
x	x	o	o	x	x	b	x	b	o	positive
b	b	x	o	o	x	o	x	x	b	positive
o	o	o	x	b	x	b	x	b	b	positive
x	x	o	b	b	x	o	o	x	x	positive
o	o	b	x	o	b	o	x	x	x	positive
x	x	b	o	o	b	o	x	x	x	positive
x	x	b	o	b	x	b	b	o	x	positive
o	o	x	o	b	x	x	b	x	o	positive
o	o	x	o	o	x	b	b	x	x	positive
b	b	o	x	o	x	x	x	b	o	positive
x	x	x	x	b	b	o	o	x	o	positive
b	b	b	o	x	x	x	x	o	o	positive
o	o	o	b	b	o	x	x	x	x	positive
o	o	x	x	o	x	o	b	x	b	positive
o	o	o	x	o	b	x	x	b	x	positive
o	o	b	o	x	x	x	o	x	b	positive
b	b	o	x	b	x	o	x	x	o	positive
x	x	x	x	b	o	o	b	x	o	positive
x	x	o	o	x	x	o	b	b	x	positive
o	o	b	x	b	b	x	b	o	x	positive
x	x	o	b	x	b	o	x	o	x	positive
b	b	x	x	o	x	o	o	x	b	positive
x	x	x	b	x	b	o	x	o	o	positive
x	x	o	b	x	o	b	x	b	b	positive
o	o	o	x	b	x	x	x	o	b	positive
b	b	b	x	o	x	o	x	x	o	positive
b	b	o	b	x	x	x	o	o	x	positive
x	x	b	x	o	b	x	o	o	x	positive
x	x	o	x	o	x	b	b	o	x	positive
x	x	x	b	o	x	o	o	b	x	positive
b	b	x	b	x	x	o	o	x	o	positive
x	x	o	o	x	x	x	b	b	o	positive
b	b	x	x	b	x	o	x	o	o	positive
x	x	b	o	x	b	o	x	b	b	positive
x	x	x	o	o	x	b	b	o	x	positive
x	x	b	o	x	x	x	o	o	b	positive
o	o	b	b	x	o	o	x	x	x	positive
o	o	o	x	x	x	o	x	b	b	positive
o	o	b	o	x	x	x	x	o	b	positive
x	x	o	x	o	x	b	x	b	o	positive
x	x	o	o	x	b	b	x	o	x	positive
o	o	o	x	x	x	x	b	b	o	positive
x	x	b	o	b	x	b	o	b	x	positive
x	x	x	o	o	x	x	o	o	x	positive
x	x	x	x	o	x	o	x	o	o	positive
b	b	x	b	b	x	o	o	x	b	positive
b	b	x	o	x	x	x	o	o	b	positive
x	x	b	o	x	x	b	x	o	o	positive
x	x	x	o	o	x	o	o	x	x	positive
b	b	o	x	o	o	b	x	x	x	positive
o	o	o	x	b	x	o	x	x	b	positive
o	o	b	x	o	x	x	b	o	x	positive
o	o	b	x	o	b	x	b	b	x	positive
x	x	x	x	b	o	o	x	b	o	positive
o	o	x	b	o	x	b	x	x	o	positive
x	x	b	b	o	x	o	x	o	x	positive
o	o	o	x	b	x	x	x	b	o	positive
x	x	o	o	b	o	b	x	x	x	positive
o	o	b	x	b	x	o	x	o	x	positive
o	o	b	b	x	x	x	b	o	b	positive
o	o	x	x	b	o	x	o	b	x	positive
x	x	x	x	o	o	b	b	o	x	positive
x	x	o	b	x	x	b	x	o	o	positive
x	x	o	b	b	x	o	x	o	x	positive
x	x	x	x	o	x	o	b	o	b	positive
b	b	o	x	o	b	x	b	b	x	positive
x	x	x	b	x	o	b	x	o	o	positive
x	x	o	o	x	x	o	o	x	x	positive
x	x	o	b	x	o	o	x	x	b	positive
x	x	o	x	b	o	x	o	b	x	positive
b	b	b	x	b	x	o	x	b	o	positive
x	x	o	o	x	b	b	x	b	b	positive
x	x	b	x	x	o	o	x	o	b	positive
x	x	x	x	o	o	x	o	b	b	positive
x	x	b	b	o	x	o	o	x	x	positive
o	o	b	o	x	x	x	x	b	o	positive
x	x	o	b	o	x	x	o	b	x	positive
x	x	x	x	o	x	o	o	x	o	positive
x	x	o	b	x	x	o	o	b	x	positive
b	b	x	o	x	x	b	o	x	o	positive
x	x	x	o	x	b	b	x	o	o	positive
o	o	x	o	x	x	o	b	x	b	positive
x	x	o	o	x	x	x	o	x	o	positive
x	x	o	b	b	x	x	o	o	x	positive
o	o	x	o	b	x	x	o	x	b	positive
x	x	x	x	b	b	o	b	b	o	positive
o	o	x	o	o	o	x	x	x	x	positive
o	o	b	x	o	x	o	x	x	b	positive
b	b	o	x	o	x	x	b	o	x	positive
o	o	b	x	o	x	x	x	o	b	positive
o	o	b	b	x	x	x	o	x	o	positive
x	x	b	b	o	x	b	b	o	x	positive
b	b	o	x	b	b	x	o	b	x	positive
b	b	b	o	x	x	x	o	o	x	positive
o	o	b	x	o	x	b	x	x	o	positive
x	x	o	x	o	o	x	o	x	x	positive
x	x	o	o	o	x	x	o	x	x	positive
x	x	x	x	o	b	b	b	o	b	positive
x	x	x	x	b	b	o	b	o	b	positive
x	x	x	o	x	b	o	x	o	b	positive
o	o	o	b	x	x	x	b	x	o	positive
o	o	x	o	b	b	o	x	x	x	positive
x	x	x	x	o	b	b	x	o	o	positive
b	b	o	b	x	x	x	o	b	b	positive
b	b	o	o	x	o	b	x	x	x	positive
x	x	b	x	o	x	o	x	b	o	positive
x	x	o	b	o	x	x	b	o	x	positive
o	o	b	x	x	x	x	o	b	o	positive
o	o	o	x	b	o	x	x	b	x	positive
b	b	o	x	x	x	o	x	b	o	positive
x	x	x	x	b	b	o	o	b	b	positive
o	o	o	x	o	x	x	x	x	o	positive
b	b	b	b	x	x	x	o	b	o	positive
b	b	o	b	x	x	x	b	b	o	positive
o	o	o	x	x	o	o	x	x	x	positive
b	b	b	b	x	x	x	o	o	b	positive
b	b	x	o	o	b	o	x	x	x	positive
b	b	b	o	x	x	x	o	x	o	positive
b	b	x	o	b	x	b	o	x	b	positive
b	b	o	x	b	o	x	o	x	x	positive
x	x	o	b	x	b	b	x	o	b	positive
o	o	x	x	x	x	o	x	o	o	positive
x	x	b	o	x	x	o	b	o	x	positive
o	o	o	x	o	x	b	x	x	b	positive
x	x	b	b	b	x	o	o	b	x	positive
o	o	x	x	b	x	o	x	o	b	positive
x	x	b	x	b	x	o	x	o	o	positive
x	x	b	x	b	o	x	o	o	x	positive
x	x	o	b	x	o	x	x	b	o	positive
x	x	o	x	b	x	b	o	o	x	positive
x	x	b	b	x	o	o	x	b	b	positive
x	x	o	o	x	x	o	x	b	b	positive
b	b	o	x	b	x	b	x	b	o	positive
x	x	x	o	b	x	b	o	x	o	positive
x	x	x	x	b	b	b	b	o	o	positive
o	o	o	x	x	x	x	o	o	x	positive
x	x	b	o	b	x	o	b	b	x	positive
x	x	o	b	x	x	x	b	o	o	positive
x	x	b	b	x	x	o	o	o	x	positive
x	x	x	o	b	x	o	o	b	x	positive
b	b	x	x	o	b	x	o	o	x	positive
b	b	o	x	o	x	x	x	o	b	positive
x	x	x	x	o	o	b	o	b	x	positive
x	x	x	x	x	o	o	o	b	b	positive
o	o	x	b	o	x	o	b	x	x	positive
x	x	x	o	x	o	x	x	o	o	positive
o	o	x	x	o	x	o	x	o	x	positive
b	b	b	x	o	b	x	o	b	x	positive
x	x	o	b	o	b	o	x	x	x	positive
o	o	b	x	b	x	x	x	o	o	positive
x	x	b	o	x	o	o	x	x	b	positive
x	x	o	o	b	x	o	x	b	x	positive
x	x	o	o	x	o	x	x	b	b	positive
x	x	o	x	b	x	o	b	o	x	positive
b	b	x	o	o	x	x	b	x	o	positive
x	x	x	b	o	x	b	o	x	o	positive
x	x	x	o	x	o	b	x	b	o	positive
x	x	b	b	x	o	b	x	o	b	positive
x	x	b	b	x	o	o	x	x	o	positive
x	x	b	o	x	o	b	x	o	x	positive
b	b	b	o	x	x	x	b	b	o	positive
b	b	b	x	o	x	x	x	o	o	positive
x	x	o	b	o	x	b	o	x	x	positive
x	x	b	o	x	o	o	x	b	x	positive
x	x	b	o	x	x	x	o	b	o	positive
b	b	o	x	o	b	x	o	x	x	positive
o	o	b	x	b	o	x	b	b	x	positive
b	b	x	o	b	x	o	o	x	x	positive
b	b	x	x	o	x	o	x	o	b	positive
x	x	x	x	o	x	o	o	o	x	positive
o	o	x	b	x	x	x	o	b	o	positive
o	o	x	x	b	b	x	o	o	x	positive
o	o	x	o	o	b	b	x	x	x	positive
o	o	o	b	x	x	x	o	b	x	positive
x	x	x	x	b	o	x	o	b	o	positive
o	o	x	x	b	x	b	x	o	o	positive
x	x	b	o	o	x	b	o	x	x	positive
x	x	b	o	x	x	o	x	o	b	positive
x	x	x	x	o	b	x	b	o	o	positive
x	x	o	b	x	o	o	x	b	x	positive
x	x	x	x	o	x	o	b	b	o	positive
x	x	b	o	o	x	b	b	b	x	positive
x	x	x	x	o	o	x	b	o	b	positive
o	o	o	x	b	x	x	b	o	x	positive
b	b	o	x	x	x	x	b	o	o	positive
x	x	x	o	o	x	o	b	b	x	positive
b	b	b	b	x	x	x	b	o	o	positive
o	o	o	b	x	o	b	x	x	x	positive
x	x	b	x	x	o	o	x	b	o	positive
b	b	b	x	o	x	b	x	b	o	positive
x	x	b	b	o	x	o	b	b	x	positive
b	b	b	b	o	o	b	x	x	x	positive
b	b	o	x	b	x	x	x	o	o	positive
x	x	x	x	o	o	x	b	b	o	positive
x	x	o	x	x	o	o	x	b	b	positive
b	b	o	x	x	x	o	x	o	b	positive
o	o	x	o	x	x	x	b	b	o	positive
o	o	o	b	x	x	x	o	x	b	positive
o	o	o	x	o	o	x	x	x	x	positive
o	o	b	x	o	x	x	x	b	o	positive
x	x	b	o	x	b	x	x	o	o	positive
o	o	o	b	x	x	x	b	o	x	positive
x	x	x	b	o	x	b	o	o	x	positive
x	x	o	b	x	x	o	x	b	o	positive
x	x	x	o	o	x	b	o	b	x	positive
b	b	o	o	x	b	o	x	x	x	positive
o	o	b	b	o	b	b	x	x	x	positive
o	o	o	x	x	x	b	x	o	b	positive
x	x	x	x	b	o	b	b	b	o	positive
x	x	o	o	b	x	b	x	o	x	positive
o	o	b	o	b	o	x	x	x	x	positive
o	o	b	o	b	x	o	x	x	x	positive
x	x	b	x	o	x	o	b	o	x	positive
x	x	x	x	b	o	o	x	o	b	positive
x	x	b	x	o	x	b	x	o	o	positive
o	o	x	b	o	x	o	x	x	b	positive
b	b	o	o	o	x	b	x	x	x	positive
o	o	b	x	b	x	b	x	b	o	positive
o	o	x	b	o	o	b	x	x	x	positive
x	x	o	x	b	x	o	x	b	o	positive
b	b	o	x	b	x	o	x	b	b	positive
x	x	x	x	o	b	o	o	b	x	positive
x	x	b	b	o	x	b	o	b	x	positive
b	b	x	b	o	x	o	x	x	o	positive
o	o	x	b	b	x	o	x	x	o	positive
o	o	x	b	x	x	x	b	o	o	positive
o	o	o	x	o	x	b	x	b	x	positive
o	o	x	x	b	x	o	o	x	b	positive
o	o	x	x	x	x	o	o	x	o	positive
x	x	o	o	x	x	x	b	o	b	positive
b	b	b	o	o	o	x	x	x	x	positive
o	o	b	b	b	b	o	x	x	x	positive
o	o	b	b	b	o	b	x	x	x	positive
x	x	o	b	b	x	b	o	b	x	positive
b	b	o	b	x	x	x	o	x	o	positive
x	x	o	b	o	o	b	x	x	x	positive
x	x	o	x	b	x	o	x	o	b	positive
o	o	b	x	o	o	b	x	x	x	positive
x	x	b	b	o	x	x	o	o	x	positive
b	b	o	b	o	o	x	x	x	x	positive
x	x	o	b	b	o	o	x	x	x	positive
x	x	b	x	o	x	o	o	b	x	positive
o	o	x	o	o	x	x	b	x	b	positive
x	x	x	x	o	o	b	o	x	b	positive
x	x	o	x	x	b	o	x	o	b	positive
o	o	b	x	o	x	b	x	o	x	positive
o	o	o	x	o	x	x	x	b	b	positive
o	o	b	b	o	o	x	x	x	x	positive
o	o	o	b	x	b	o	x	x	x	positive
o	o	o	x	b	x	b	x	o	x	positive
b	b	b	x	x	x	o	x	o	o	positive
b	b	x	x	o	o	x	b	o	x	positive
x	x	x	x	o	b	b	o	o	x	positive
x	x	b	x	x	b	o	x	o	o	positive
b	b	x	o	o	x	b	b	x	b	positive
x	x	o	b	x	x	x	o	b	o	positive
x	x	o	x	x	x	o	o	o	x	positive
x	x	o	b	x	b	x	x	o	o	positive
o	o	b	o	b	b	b	x	x	x	positive
o	o	o	x	x	x	o	x	o	x	positive
x	x	o	o	x	b	x	x	o	b	positive
x	x	o	o	x	o	b	x	b	x	positive
x	x	x	x	b	o	b	b	o	b	positive
b	b	o	x	b	x	x	o	o	x	positive
x	x	o	o	b	x	o	b	x	x	positive
b	b	b	o	x	x	x	o	b	b	positive
b	b	b	x	b	b	x	o	o	x	positive
x	x	x	x	x	o	o	b	o	b	positive
x	x	x	b	o	x	o	b	x	o	positive
x	x	x	x	x	o	b	o	b	o	positive
x	x	o	o	o	b	b	x	x	x	positive
x	x	o	x	x	o	b	x	b	o	positive
x	x	o	o	x	x	b	x	o	b	positive
o	o	o	x	b	o	b	x	x	x	positive
b	b	o	x	o	x	o	x	b	x	positive
o	o	x	o	x	x	x	x	o	o	positive
o	o	x	o	b	o	b	x	x	x	positive
x	x	b	o	x	o	x	x	b	o	positive
o	o	o	x	o	b	x	b	x	x	positive
b	b	o	x	o	b	x	x	o	x	positive
b	b	o	b	b	o	b	x	x	x	positive
b	b	o	x	x	x	b	x	o	o	positive
b	b	x	b	o	x	o	o	x	x	positive
b	b	x	b	o	x	o	b	x	b	positive
x	x	o	o	o	o	x	x	x	x	positive
x	x	x	b	b	x	o	o	o	x	positive
o	o	b	x	x	x	o	x	b	o	positive
x	x	b	x	o	o	x	b	o	x	positive
o	o	x	b	x	x	b	o	x	o	positive
o	o	x	b	b	x	x	o	x	o	positive
x	x	x	o	o	x	x	o	x	o	positive
b	b	o	x	b	o	x	b	b	x	positive
b	b	b	x	o	x	o	x	o	x	positive
b	b	o	x	x	b	x	o	o	x	positive
o	o	o	x	b	b	x	x	o	x	positive
x	x	x	x	o	b	b	o	b	b	positive
x	x	o	x	b	x	o	o	b	x	positive
o	o	o	x	b	b	x	b	b	x	positive
o	o	b	x	b	x	b	x	o	b	positive
x	x	o	x	o	x	o	x	o	x	positive
o	o	b	x	b	x	x	o	o	x	positive
o	o	o	x	x	x	x	o	x	o	positive
o	o	x	b	o	x	b	b	x	b	positive
o	o	o	x	b	b	x	o	x	x	positive
x	x	o	o	o	x	b	b	x	x	positive
o	o	b	o	x	x	x	b	o	x	positive
o	o	x	o	x	x	x	o	b	b	positive
x	x	b	o	b	x	o	o	x	x	positive
o	o	x	o	x	x	b	o	x	b	positive
x	x	o	o	o	x	x	b	b	x	positive
b	b	x	x	b	o	x	o	o	x	positive
b	b	x	o	x	x	x	b	o	o	positive
o	o	b	x	b	b	x	o	b	x	positive
b	b	o	o	x	x	x	x	o	b	positive
o	o	o	b	o	x	b	x	x	x	positive
x	x	b	o	x	b	b	x	b	o	positive
x	x	b	o	b	x	x	o	o	x	positive
x	x	o	o	x	b	x	x	b	o	positive
o	o	x	o	b	x	o	b	x	x	positive
x	x	x	x	b	o	o	o	x	b	positive
x	x	o	o	x	o	x	x	x	o	positive
o	o	x	b	b	x	b	o	x	b	positive
x	x	b	o	o	x	b	x	o	x	positive
o	o	o	x	x	x	o	x	x	o	positive
b	b	o	x	x	x	x	o	b	o	positive
x	x	b	o	x	o	b	x	x	o	positive
